# Supplementary material for: Multilayered control of splicing regulatory networks by DAP3 leads to widespread alternative splicing changes in cancer
Source: PubMed Central journal article supplement (PMC8980049; doi:10.1038/s41467-022-29400-7), 2022-04-04
Supplement: 41467_2022_29400_MOESM3_ESM.pdf [file 41467_2022_29400_MOESM3_ESM.pdf]

## **Description of Additional Supplementary Files**

File Name: Supplementary Data 1

Description: Significant DAP3 binding peaks in eCLIP-seq.

File Name: Supplementary Data 2

Description: Significant alternative splicing events after DAP3 knockdown in EC109 cells.

File Name: Supplementary Data 3

Description: Significant alternative splicing events after DAP3 knockdown in KYSE180 cells.

File Name: Supplementary Data 4

Description: SILAC-MS data of DAP3 pulldown in EC109 cells.

File Name: Supplementary Data 5

Description: Significant alternative splicing events co-modulated after DAP3 and RBM6 knockdown in EC109 cells.

File Name: Supplementary Data 6

Description: Significant alternative splicing events in 13 pairs of TCGA ESCA tumors and matched normal tissues.

File Name: Supplementary Data 7

Description: Primer and probe sequences.
